# Supplementary material
Source: publisher figshare collection journal article supplement (https://rs.figshare.com/ndownloader/files/14201069)
Supplement: Supplementary file 1 [file 14201069]

subject	cond	Situationsschilderung	age	akz1	akz2	akz3	akz4	akz5	angenehm	anx10_themanichtversteh	anx11_schnell	anx1_gespraechsverlauf	anx2_bewegen	anx3_robo_tun	anx4_roboreden	anx5_robostark	anx6_unwichtigeDingesag	anx7_roboantwort	anx8_robonichtversteh	anx9_worueberreden	att10_nervoes	att11_etwasschlimmes	att12_sprechenmerkwuerdig	att13_kinder	att14_dominieren	att1_gefuehle	att2_schlimmespassieren	att3_unterhaltengut	att4_jobmitrobo	att5_anfreunden	att6_gefuehlegut	att7_robokeinebedeutung	att8_robobedienen	att9_bewerten	cont1_zeitverb	cont2_zuhause	cont3_kennenlern	cont4_unterhalten	cont5_besitzzeit	cont6_kaufen	de	de_live	de_start	interak1_auskuenfte	interak2_behoerde	interak3_geschaeft	interak4_coach	interak5_gespraech	interak6_bewachen
1	1	beim Kochen Abwasch Staubsaugen allgemein sauber machen Haushaltsprobleme lösen (Reparationen PC) bei Denkaufgaben wie z.B. Hausaufgaben körperlich anstrengende Tätigkeiten wie Einkauf tragen.	26	2	3	4	2	3	5	6	1	3	1	3	1	3	1	1	5	1	1	5	3	4	5	7	3	3	2	6	2	6	1	2	2	6	5	3	3	5	1	99	99	7	5	6	4	2	7
2	1	Ich habe mie vorgestellt wie der Roboter mit beim Haushalt hilft; aufräumt abwäscht saugt etc. Außerdem könnte er mich morgens aufwegen indem er mit mir spricht und zum Beispiel Musik anmacht.	23	1	1	2	1	1	5	4	5	3	2	6	4	5	3	6	6	6	3	6	5	6	5	7	6	4	7	1	2	4	3	6	2	3	4	4	2	3	1	99	99	5	2	2	3	1	4
3	1	ich habe mir den roboter als haushaltsgerät vorgestellt der in der küche irgendwelche kleineren aufgaben erfüllt. ich habe mit ihm gesprochen wie mit einem SIRI handy.	26	1	1	1	1	1	4	7	1	7	1	1	1	4	7	4	7	1	4	4	1	1	4	4	1	4	4	4	4	4	2	6	1	4	1	4	2	2	2	polnisch	0	7	7	4	4	1	7
4	1	Ich stelle mir vor dass NAO mir bei einfachen Dingen im Haushalt hilft d.h. dem Ausführen einfacher Aufgaben oder dem wiederfinden von Gegenständen.	24	4	4	1	4	4	6	5	1	3	1	1	1	1	1	1	5	3	1	1	1	3	6	4	7	7	2	4	4	7	1	1	5	7	6	7	5	7	1	99	0	7	7	7	1	4	7
5	1	NAO könnte bei Hausaufgaben helfen als eine art intelligentes google.	24	3	2	3	3	3	5	2	3	3	3	3	2	3	3	3	3	3	2	3	2	3	3	4	3	4	3	5	4	5	2	2	4	5	5	4	4	5	1	99	99	5	5	5	4	4	3
6	1	Ich habe mir vorgestellt dass NAO mit beim Schreiben meiner Abschlussarbeit hilft. Ich frage ihn nach bestimmten Suchbegriffen die er im Netz für mich nachschlägt er vervollständigt Quellenangaben sucht nach relevanten Artikeln und bewertet die Vollständ	26	4	3	3	3	3	6	2	3	4	1	2	3	3	2	3	5	2	2	2	2	2	1	5	2	6	2	6	4	4	2	2	5	7	6	6	5	6	1	99	99	7	6	6	6	3	6
7	1	Ich habe mir vorgestellt dass der Roboter mich bei alltäglichen Aufgaben im Haushalt unterstützen könnte wie z.B. Staub wischen und Wäsche waschen.	20	2	4	4	5	2	6	6	1	6	2	1	2	1	1	6	5	4	1	6	5	1	6	2	2	6	1	4	4	7	2	2	5	6	5	5	4	6	1	99	99	6	5	6	2	5	5
8	1	Der Nao sollte mir bei der Ablage vom Papieren helfen. Dazu soll er von mir die Zettel übergeben bekommen und sie dann eigenständig in ein Schubfachsystem ablegen. Wenn sich der Nao nicht sicher ist worum es in den Papieren geht soll er nachfragen. Und da	25	4	4	3	3	3	7	7	2	5	4	2	2	3	5	4	6	3	1	2	2	2	5	3	2	5	1	3	4	1	3	2	6	7	7	5	5	7	1	99	99	7	7	7	7	2	7
9	1	NAO hilft mir bei den Arbeiten bei denen ich in Höhen arbeiten muß z. B. Fensterputzen Decke absaugen Glühlampen austauschen usw. Dabei leite ich NAO mit gesprochenen Anweisungen an.	38	2	2	2	2	1	5	3	2	2	1	3	2	5	1	2	2	3	2	5	2	2	2	3	6	4	4	3	3	1	1	1	2	2	3	3	2	1	1	99	99	7	5	5	5	2	6
10	1	Nao könnte ich als Terminkalender verwenden der mich beispielsweise über vereinbarte Termine am jeweiligen Tag erinnert außerdem ist es sicherlich von vorteil wenn ich den roboter als banking umsetzer verwenden kann und ihm sage überweise betrag x an pers	23	4	2	1	2	2	6	4	1	2	1	3	1	1	2	1	2	2	1	2	2	1	6	4	1	5	2	2	3	5	3	5	3	6	5	5	4	5	2	türkisch	99	7	5	6	5	4	5
11	2	Nao sagt mir welches paar ich für ihn aufdecken soll. Dabei bewegt er stets seinen kopf. Erstmal zu mir und dann zu den von ihm ausgewählten plättchen worauf er auch mit den fingern zeigt. Mit den fingern zeigt er mit ausreichend abstand so dass dies den	26	2	4	3	3	4	6	6	3	4	4	2	3	5	3	4	5	2	2	6	3	5	6	2	5	5	5	6	5	3	4	2	5	5	5	5	4	5	1	99	99	6	6	6	5	3	6
12	2	Ich und Nao sitzen uns gegenüber. Es ist Naos Zug er fordert mich auf die erste Karte aufzudecken ( die Karten auf dem Tisch sind gleichmäßig verteilt in einem schachbrettartigen System ). Ich decke die Karte auf. Nao fordert mich nun auf eine weitere Kar	25	4	4	4	4	4	6	6	4	2	4	1	2	1	4	2	3	4	1	5	1	4	1	1	4	7	1	7	6	4	1	4	7	7	7	7	6	7	2	99	4	6	7	6	5	7	7
13	2	Memory-Spiel mit NAO wie aufgebaut ich wähle zwei Karten dann er dann ich dann er bis jemand gewinne.	23	5	3	2	7	3	4	7	2	6	3	5	2	3	2	2	5	4	1	2	3	2	1	3	2	4	1	5	4	6	1	3	4	5	5	6	4	5	1	99	99	6	7	7	3	5	6
14	2	ich habe mir vorgestellt dass er sehr gut ist dass es nur wenige Fehler macht und dass er am Ende gewinnt. Als er dann fragt ob ich nochmal spielen möchte sage ich nein weil ich mir sicher bin dass er nochmal gewinnen wird.	22	2	1	3	5	3	6	6	2	2	2	2	2	3	1	2	6	1	2	6	1	2	2	2	6	6	2	2	5	7	3	2	5	6	6	3	3	7	2	türkisch	99	5	2	7	6	6	6
15	2	Ich sitze dem Roboter gegenüber und gebe meinen Zug an. Er gibt mir seinen Zug an ich teile dem Roboter mit ob er ein Match oder ein Mismatch hat. Ich teile ihm ggf. mit welches Bild er aufgedeckt hat. Ich teile dem Roboter immer mit was ich aufgedeckt ha	22	1	1	1	1	4	6	1	1	1	1	1	1	1	1	1	1	1	1	1	1	1	1	4	1	6	1	5	3	1	1	1	4	2	7	7	4	4	1	99	99	7	7	7	7	1	4
16	2	Ich habe imaginiert dass ich ggü. NAO sitze und mit ihm Memomy spiele. Zuerst habe ich 2 Karten aufgedeckt dann habe ich 2 Karten für ihn aufgedeckt. Dieser Vorgang wiederholte sich solange bis ich gewonnen hatte und NAO mich fragte ob wir noch einmal spi	31	1	1	1	2	1	5	6	1	4	1	2	2	2	2	1	4	2	1	2	1	1	7	2	5	7	1	5	5	4	2	1	5	7	7	7	3	7	1	99	99	7	7	7	2	2	7
17	2	Habe mir vorgestellt wie ich einem Roboter gegenübersitze und ich abwechselnd einmal für mich und dann nach Ansage für den Roboter eine Karte umdrehe. Das hat nach meiner Vorstellung auf einem Tisch hier stattgefunden.	30	1	1	1	1	1	6	7	2	6	1	2	4	1	3	3	7	3	1	6	5	2	5	3	4	5	1	1	1	1	3	2	5	5	6	5	5	5	1	99	99	7	6	6	5	1	3
18	2	ich decke eine Karte meiner Wahl auf anschlieend decke ich eine weitere auf die der NAO mir nannte auf und wenn es kein paar ist decke ich beide wieder zu sonst lasse ich sie offen. anschlieend wird dieser vorgang wiederholt bis keine verdeckten Karten me	25	3	3	4	3	4	5	6	2	4	5	3	2	5	1	3	6	3	1	5	5	2	4	6	4	4	2	3	3	2	1	3	5	5	5	5	3	7	1	99	99	6	6	6	6	4	2
19	2	ich habe mir den nao vorgestellt und wie wir beide nacheinander die karten umdrehen und er mich am ende des spiels nach einer weiteren partie fragt	40	4	4	4	4	4	5	5	3	5	2	3	4	3	3	4	5	3	2	3	3	4	3	3	4	5	3	6	5	4	3	3	5	5	5	5	5	5	1	99	99	5	5	5	5	5	5
20	2	Ich spiele gegen NAO Memory. NAO fängt an und deckt zwei Karten auf dreht sie anschließend wieder um. Als nächstes bin ich an der Reihe und decke ebenfalls zwei Karten auf. Ich ärgere mich als NAO gegen mich die nächste Runde schon gewinnt. NAO merkt sich	21	2	4	4	2	4	5	6	3	6	1	4	2	6	1	1	5	1	1	2	3	2	5	5	4	5	1	2	3	2	1	3	5	4	6	6	5	4	2	russisch	3	6	7	7	7	5	3
21	1	das er mir beim kochen hilft putzen wenn ich was suche dass er weisst wo das ist sachen anreicht beim rechnen hilft	26	4	4	4	4	4	6	99	4	4	4	4	4	4	4	4	4	4	3	4	2	4	4	3	4	5	3	5	4	3	4	4	5	6	6	6	5	6	2	99	9	6	5	6	5	5	4
22	1	wäschewaschenundbügelndesessenkochenunddashauszuputzenbzwaufzuräumenwirhabenzusammengearbeitetundhattendadurchauchetwasspassbeiderarbeitundeswarnichtsolangweilig	20	2	1	2	3	4	5	3	4	2	3	3	4	4	3	3	3	3	2	2	2	4	7	4	3	6	3	2	3	2	2	3	5	5	5	5	4	6	1	99	99	5	5	2	3	4	2
23	1	Ein "Gespräch" zwischen mir und NAO. Ich gab Anweisungen die der Roboter ohne Beanstandung korrekt ausführte. Jedoch eine distanzierte und kalte SItuation. Eher als Gerät anzusehen als ein Haushaltshelfer (mit Kommunikationsfähigkeit).	19	1	2	2	2	1	3	6	5	6	5	4	2	7	4	6	6	6	2	7	7	6	6	7	4	3	5	2	2	4	5	4	3	2	7	7	3	3	1	99	99	5	3	5	5	1	5
24	1	Er könnte mir beim Spülen helfen und beim hochtragen meiner Sachen wenn ich vom Wochenende zurück nach Bielefeld komme. Außerdem würde er mit mir Sprechen wenn gerade meine Mitbewohnerin keine Zeit hat und ich irgendeine Frage habe.	19	5	4	3	3	3	6	6	6	5	2	6	5	6	3	4	4	4	2	4	2	3	7	5	4	6	3	4	4	2	1	5	4	6	4	4	3	6	1	99	99	6	1	2	6	5	3
25	1	Der Roboter hilft mir meinen Tag zu planen er hat alle Termine von meinem Handykalender eingespeichert und erinnert mich daran. Er stellt morgens die Kaffeemaschine an und fährt Heizung Licht Jalousinen etc. hoch (je nach Jahreszeit). Er hilft mir bei der	24	4	5	4	3	3	5	5	2	6	3	6	2	6	1	2	5	2	2	5	3	2	3	6	7	3	3	5	3	2	5	5	3	5	5	5	3	5	1	99	99	6	5	6	4	3	6
26	1	der Roborter hilft mir beim KochenPutzen Aufräumen und in anderen Situationen im Haushalt	20	1	1	1	2	1	5	4	3	5	4	5	4	5	3	2	4	5	2	6	5	5	2	7	6	3	6	1	1	6	4	7	2	3	2	99	3	4	1	99	99	3	4	5	5	1	3
27	1	Nao hilft mir dabei mein Frühstuck zuzubereiten und mein Mittagessen für die Uni vorzubereiten. Außerdem ist er ein guter Freund der mir bei vielen Alltagsentscheidungen helfen kann wie zum Beispiel bei den Uni Hausaufgaben etc. Für den Haushalt kann er e	19	7	3	5	4	4	5	6	4	6	3	4	1	1	2	1	4	2	5	7	1	7	6	2	1	6	4	7	5	2	1	4	7	5	7	7	7	5	1	99	99	7	1	7	7	3	3
28	1	er kann mir beim putzen helfen wir können zusammen spiele spielen wenn ich in der Uni bin soll er putzen und saugen etc. schön wäre es wenn er mir auch bei Schreibsachen behilflich sein kann sodass ich ihm was diktiere und er schreibt es auf sowie abfrage	23	2	2	3	1	3	6	6	2	5	1	5	5	2	2	3	5	5	1	3	5	4	5	6	1	6	3	3	2	6	3	6	7	5	7	7	3	6	1	99	99	6	7	6	7	2	7
29	1	Er würde saugen staubwischen fegen Betten beziehen aufräumen mit ihm reden ihm alles erklären	20	3	4	4	4	5	7	5	3	3	2	2	5	5	2	2	5	2	1	1	1	1	1	1	1	6	1	7	7	5	1	1	4	2	7	7	5	3	1	99	99	6	5	5	4	5	7
30	1	habe mir vorgestellt dass er den Einkauf macht und saugt putzt mir im Haushalt hilft.Vielleicht auch mit mir spricht oder mit mir Ball spielt.	19	1	2	2	2	3	5	7	4	6	1	5	5	6	3	3	7	6	1	5	3	5	2	7	5	4	3	1	1	2	2	4	3	2	3	3	2	2	1	99	99	4	5	5	4	2	6
31	2	Ich war als Erstes dran. Das Feld war etwa 8x8 Karten groß und ich habe zuerst die oberste linke Karte aufgedeckt und dann eine in der Mitte es gab kein Pärchen. Dann hat NAO sein erstes Pärchen mit mitgeteilt was er dadurch gemacht hat dass er einen Buch	22	6	1	1	4	4	5	7	1	7	1	1	99	1	1	2	6	2	1	7	4	1	5	3	2	6	1	7	3	2	1	3	5	5	7	7	5	6	1	99	99	7	7	7	7	5	7
32	2	ich habe mir vorgestellt wie ich meine karten aufdecke und wieder zudecke. danach hat der roboter mir gesagt welche karten ich für ihn aufdecken soll. diese habe ich auf- und wieder zugedeckt bis alle paare gefunden wurden.	22	1	1	1	2	2	3	6	4	6	4	5	3	3	2	4	6	4	3	4	6	5	4	6	6	4	4	3	3	5	6	6	2	3	5	4	3	2	1	99	99	6	3	3	5	2	4
33	2	Ich habe mir vorgestelle dass der Roboter mir sagt welche Karten ich aufdecken soll. Diese habe ich dann umgedreht. Sie haben nicht zusammen gepasst. Anschließend habe ich für mich zwei Karten umgedreht. Das Spiel hat der Roboter gewonnen. Anschließend ha	24	2	1	2	2	1	4	7	3	7	4	6	3	7	4	6	6	6	3	6	4	6	3	7	5	3	5	2	1	3	7	6	2	1	4	3	2	1	1	99	99	4	3	5	3	1	1
34	2	den NAO Roboter sein mögliches Gesicht wie er mit mir spricht und eventuell eine Bewegung macht welche Karte ich anheben soll. meine hände die seinen Anweisungen folgen.	22	2	1	1	4	2	4	1	3	2	1	4	1	5	1	4	3	3	4	6	3	5	4	5	5	5	5	3	2	2	6	6	2	2	3	4	4	2	2	Polnisch	99	4	2	3	1	3	4
35	2	Ich stellte mir vor dass Nao und ich uns an einem Tisch gegenüber sitzen. Zunächst deckte ich zwei Karten auf und drehte diese wieder um. Im nachhinein zeigte Nao mit dem Finger auf die Karten die ich für ihn aufdecken sollte. Nach dem Aufdecken drehte ic	22	5	5	5	2	4	6	4	1	2	1	2	4	3	1	1	4	3	2	5	3	4	2	1	2	7	1	7	6	2	1	1	7	7	7	7	6	7	2	Mazedonisch	99	6	6	6	6	6	6
36	2	Ich habe mir vorgestellt wie ich NAO gegenüber sitze und ein Raster Memorykarten zwischen uns liegt. Ich habe mir vorgestellt wie ich zwei Karten aufdecke und wieder zudecke. Danach gibt NAO mir Anweisungen welche Karten er aufdecken möchte. Ich decke die	23	4	4	6	4	4	5	6	2	5	2	3	3	4	3	2	5	3	4	3	4	2	2	3	4	5	2	4	5	3	5	2	6	5	6	6	4	6	1	99	99	6	6	6	6	5	6
37	2	ich habe mir vorgestellt dass ich zuerst zwei Kärtchen nacheinander aufdecke anschließend verdecke ich diese wieder dann sagt der Roboter mir welche Karten ich für ihn aufdecken soll diese verdecke ich wieder wenn alle Pärchen gefunden sind fragt mich der	24	2	3	3	2	2	2	7	3	6	5	6	6	5	5	3	7	3	2	5	6	5	5	6	6	5	4	3	2	2	3	5	5	3	5	6	3	5	1	99	99	6	5	5	2	3	2
38	2	Ich habe mir vorgestellt wie ein menschenähnlicher Roboter mir gegenüber sitzst. In der Mitte liegt ein Memoryspiel. Der Roboter zeigt auf die Karten die aufgedeckt werden sollen. Ich decke sie auf. Sobald alle Pärchen aufgedeckt waren fragte der Roboter	21	2	2	1	3	3	4	5	2	2	1	4	2	4	5	3	6	4	1	6	5	2	3	7	5	3	4	2	2	6	2	4	3	5	3	4	4	5	1	99	99	6	6	5	6	2	5
39	2	Ich habe nir vorgestellt wie NAO mir am Tisch gegenüber sitzt und wir Memory spielen. Die Karten sind nummeriert und der Roboter sagt mir welche ich für ihn aufdecken soll. Wir decken abwechselnd auf und die gelösten Karten kommen auf einen Stapel. Am End	19	4	3	3	4	3	4	5	3	5	2	5	3	5	3	4	5	4	1	5	3	1	2	6	5	5	2	2	2	2	3	4	5	4	6	6	3	5	2	russisch	99	6	6	6	3	2	5
40	2	ich habe mir vorgestellt dass ich zwei karten aufdecke es aber nicht die richtigen karten sind. danach sagt mir der roboter wedlche karten ich für ihn aufdecken soll und er deckt alle paare richtig hintereinander auf. trotzdem macht es spaß und ich möchte	23	2	2	2	2	4	6	2	5	5	1	5	2	7	1	1	6	1	1	6	1	6	6	3	6	6	2	7	4	7	1	2	7	4	7	7	4	5	2	Kroatisch	99	6	7	7	4	2	4
[truncated: 63 more columns]
